# Supplementary material for: Orbital engineering-activated intrinsic conduction enables ultra-high-rate performance zinc storage in manganese dioxide
Source: Royal Society of Chemistry journal article supplement (doi:10.1039/d5ee05832e), 2026-01-01
Supplement: d5ee05832e1.pdf [file d5ee05832e1.pdf]

## Supplementary Information for

### Orbital Engineering Activated Intrinsic Conduction Enables Ultra-high-rate Performance Zinc Storage in Manganese Dioxide

Huihui Hu<sup>1†</sup>, Yanhong Feng<sup>1\*†</sup>, Zhiwei Wang<sup>1</sup>, Longchao Zhuo<sup>2</sup>, Cejun Hu<sup>3\*</sup>, Imran Shakir<sup>4</sup>, Dingsheng Wang<sup>5</sup>, and Xijun Liu<sup>1\*</sup>

<sup>1</sup> MOE Key Laboratory of New Processing Technology for Nonferrous Metals and Materials, Guangxi Key Laboratory of Processing for Non-ferrous Metals and Featured Materials, School of Resources, Environment and Materials, Guangxi University, Nanning, 530004 Guangxi, China

<sup>2</sup> School of Materials Science and Engineering, Xi'an University of Technology, Xi'an, 10048, China

<sup>3</sup> College of Materials Science and Engineering, Fuzhou University, Fuzhou, 350108 Fujian, China

<sup>4</sup> Department of Physics, Faculty of Science, Islamic University of Madinah, Madinah 42351, Saudi Arabia

<sup>5</sup> Department of Chemistry, Tsinghua University, 100084, Beijing, China

\*Corresponding authors: fyh0811@gxu.edu.cn; cejun\_hu@fzu.edu.cn; xjliu@gxu.edu.cn;

† These authors contributed equally: Huihui Hu, Yanhong Feng

## Experimental section

### Synthesis of $\text{Fe}_x\text{-MnO}_2$ and $\text{MnO}_2$ cathodes ( $x = 0.01, 0.02, 0.015$ )

Take the  $\text{Fe}_{0.015}\text{-MnO}_2$  (abbreviated as Fe-MnO<sub>2</sub>) sample for example, first, 0.3 mM of  $\text{KMnO}_4$  and 0.015 mM  $\text{Fe}(\text{NO}_3)_3 \cdot 9\text{H}_2\text{O}$  were added into 40 mL of deionized water (DI) under magnetic stirring. Then, 0.06 mM of  $\text{MnSO}_4 \cdot \text{H}_2\text{O}$  was added into the above solution and stirred for another 20 min. A piece of carbon cloth (4 cm × 3 cm) was put into the above solution, transferred into a Teflon-lined stainless steel autoclave and heated at 120°C for 1.5 h. After cooling down to room temperature, the obtained Fe-MnO<sub>2</sub> was washed with DI water three times, and dried in a vacuum oven at 60°C for 8 h. The method for synthesizing  $\text{Fe}_{0.01}\text{-MnO}_2$  and  $\text{Fe}_{0.02}\text{-MnO}_2$  samples as above with the content of  $\text{Fe}(\text{NO}_3)_3 \cdot 9\text{H}_2\text{O}$  were 0.01 mM and 0.02 mM, respectively. And the method for synthesizing  $\text{MnO}_2$  sample also as above but not added  $\text{Fe}(\text{NO}_3)_3 \cdot 9\text{H}_2\text{O}$ . All the materials were directly used as cathodes without any binders and conducting agents.

### Materials characterization

Bruker D8 X-ray diffractometer (Bruker XRD Goniometer, A24A10) was used for testing the crystal information. The Operando XRD (model ARLEquinox3000) from ThermoFisher USA, was used with an operating voltage of 40 kV, a current of 40 mA, a scanning range of 10-80°, and a test time of 10 min. Scanning electron microscope (SEM) images were obtained on a Zeiss in-situ SEM (sigma 300) for testing the morphology. Transmission electron microscopy (TEM) images and energy dispersive X-ray spectroscopy (EDX) mapping were obtained by an FEI Talos F200X S/TEM with an FEG for testing the structure and elements. X-ray absorption spectroscopy including X-ray absorption near edge structure (XANES) and extended X-ray absorption fine structure (EXAFS) measurements were performed by using the tabletop X-ray absorption fine structure spectrometer (Anhui Specreation Instrument Technology Co., LTD, TableXAFS-500A). The spectra were recorded in the fluorescence mode of the monochromator equipped with a passivated implanted planar silicon detector. X-ray photoelectron spectroscopy (XPS) measurements using Thermo

ESCALAB 250 XI + Spectrometer for testing valence state. Brunauer-Emmett-Teller (BET) surface area measurements were performed through nitrogen sorption on Micromeritics ASAP 2460. Inductively coupled plasma optical emission spectrometry (ICP-OES) data were collected on Agilent 7700 to determine the content of elements in solution. Conductivity is tested as a function of pressure by means of a four-probe, type ST2722B. Cyclic voltammetry (CV) tests and electrochemical quartz crystal microbalance (EQCM) measurements were performed on a CHI440C (CH Instruments) electrochemical workstation. Ultraviolet-visible spectroscopy (Fig. S24) absorption spectrum was obtained using a UV-1800PC spectrophotometer (Shanghai Jinghua Technology Instrument Co., Ltd.).

### **Electrochemical measurements**

For punch-cell, the Fe-MnO<sub>2</sub> were directly used as cathodes without cut with the mass loading of active material was  $\sim 1.33 \text{ mg cm}^{-2}$  for packaging, electrode area was  $3 \times 4 \text{ cm}^2$ , electrolyte volume was  $\sim 1 \text{ mL}$ . For coin-cell, the MnO<sub>2</sub> and Fe-MnO<sub>2</sub> were diced into 12 mm diameter circles and used as the working electrodes with the mass loading of active material was around 0.8-1.2 mg, electrode area and electrolyte volume were  $1.13 \text{ cm}^2$  and 100  $\mu\text{L}$ , respectively. The reference electrode using Zn foil with 0.15 mm thickness and the aqueous solution containing ZnSO<sub>4</sub> (2 M) and MnSO<sub>4</sub> (0.1 M) used as electrolyte. Glass fiber membrane (GF/D) used as the separator. The galvanostatic charge/discharge (GCD) was tested in a NEWARE battery test system (BTS80) under the voltage range of 0.8-1.85 V. Cyclic voltammetry (CV) measurements were tested in an electrochemical workstation (CHI 660E). *In-situ* electrochemical impedance spectroscopy (*In-situ* EIS) was measured on an DH7003B electrochemistry workstation by sweeping the frequency from 100 kHz to 0.01 Hz with an alternating current amplitude of 5 mV. For galvanostatic intermittent titration technique (GITT) measurement, the cell was discharged/charged for 5 min at 200 mA g<sup>-1</sup>, followed by a 60 min relaxation process to reach the voltage equilibrium. The ion diffusion coefficient was calculated by the following equation:

$$D_{GIT} = \frac{4}{\pi\tau} \left( \frac{n_m V_m}{S} \right)^2 \left( \frac{\Delta E_s}{\Delta E_\tau} \right)^2$$

where  $\tau$ ,  $n_m$ ,  $V_m$ , and  $S$  presented the constant current pulse duration, the amount of active material, molar volume, and the electrode-electrolyte interface, respectively.  $\Delta E_s$  was the steady-state voltage change under the current pulse.  $\Delta E_\tau$  was voltage change under the constant current pulse after the eliminating of  $iR$  drop.

The  $\text{Mn}^{2+}$  concentration using formaldehyde oxime spectrophotometry under UV-vis, respectively. The standard curve was established using standard solutions containing 2 M  $\text{ZnSO}_4$  and varying concentrations (0, 0.02, 0.04, 0.08, 0.15 M) of  $\text{MnSO}_4$ . The linear regression equation obtained was:  $y = 6.176 x + 0.137$ , with a correlation coefficient:  $r = 0.99963$ .

EQCM measurements were performed using a two-electrode system with a gold quartz crystal resonator as the working electrode and zinc foil as the counter and reference electrodes. For sample preparation of the EQCM, Au-coated quartz crystals were coated using a pipette with a slurry containing 80 wt.% Fe- $\text{MnO}_2$  powder, 10 wt.% of Super P, and 10 wt.% of polyvinylidene fluoride binder in N-methyl-2-pyrrolidone. The electrolyte was 2 M  $\text{ZnSO}_4$  together with 0.1 M  $\text{MnSO}_4$ . EQCM experiments rely on the calculation of mass change ( $\Delta m$ ) at the quartz crystal using the measured frequency change ( $\Delta f$ ) as given by the Sauerbrey equation:

$$\Delta f = -2f_0^2/[A(\mu\rho)^{1/2}] \Delta m,$$

where  $f_0$  is the resonant frequency of the fundamental mode of the crystal,  $A$  is the area of the gold disk coated onto the crystal (0.205 cm<sup>2</sup> for the included crystal),  $\rho$  is the density of the crystal, and  $\mu$  is the shear modulus of quartz. The density of the crystal is 2.648 g cm<sup>-3</sup> and the shear modulus  $\mu$  is  $2.947 \times 10^{11}$  g/cm s<sup>2</sup>. For an 8 MHz crystal, a 0.1 Hz change in frequency corresponds a mass change of 0.14 ng.

### Density functional theory (DFT) calculation methods

DFT calculations were performed using the Vienna Ab-initio Simulation Package (VASP) with a supercell of  $2 \times 2 \times 1$ <sup>1, 2</sup>. The gradient-corrected exchange correlation functional of Perdew-Burke-Ernzerh generalized-gradient-approximation (PBE-GGA)

was employed. In order to more accurately describe the d orbitals of transition metals, the DFT+U method was used. The effective U values given to Fe and Mn ions were 5.3 eV, and 3.9 eV, respectively. The computational process also encompassed magnetic calculations, with Mn and Fe values set at 3 and 5. A plane-wave basis with 520 eV energy cut-off was adopted using the projector augmented wave (PAW) basis-set and the converge criteria of the force on each relaxed atom below 0.01 eV Å<sup>-1</sup> were used. The convergence criteria were chosen such that the changes were 10<sup>-5</sup> eV for the energy. The equilibrium lattice constants of MnO<sub>2</sub> unit cell were optimized when using a 5 × 5 × 1 monkhorst pack K-point grid for Brillouin zone sampling. The Brillouin zone integral utilized the surfaces structures of 3 × 3 × 1 monkhorst pack K-point sampling. While the MnO<sub>2</sub> crystal consists of 32 Mn and 64 O atoms, the Fe-MnO<sub>2</sub> is composed of 30 Mn, 2 Fe, and 64 O atoms. Every atom in these two models underwent relaxation. The adsorption energies (*E*<sub>ads</sub>) were calculated as  $E_{ads} = E_{ad/sub} - E_{ad} - E_{sub}$ , where *E*<sub>ad/sub</sub>, *E*<sub>ad</sub>, and *E*<sub>sub</sub> are the optimized adsorbate/substrate system, the adsorbate, and the clean substrate, respectively. The climbing imaged nudged elastic band (CI-NEB) method was employed to calculate the Zn ion migration barrier<sup>3</sup>. The calculation of the diffusion barrier of Zn was performed on two models of Fe-MnO<sub>2</sub> and MnO<sub>2</sub>.

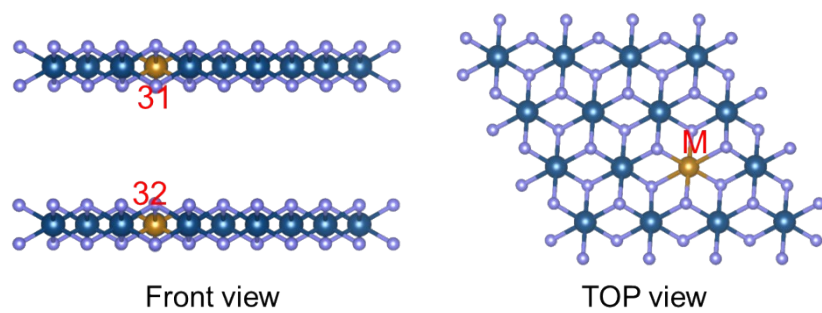

**Fig. S1** The Front view and TOP view of the stable M-MnO<sub>2</sub> configurations (M: Fe, Mg, Ca, Ni, Ag, Cu, Co).

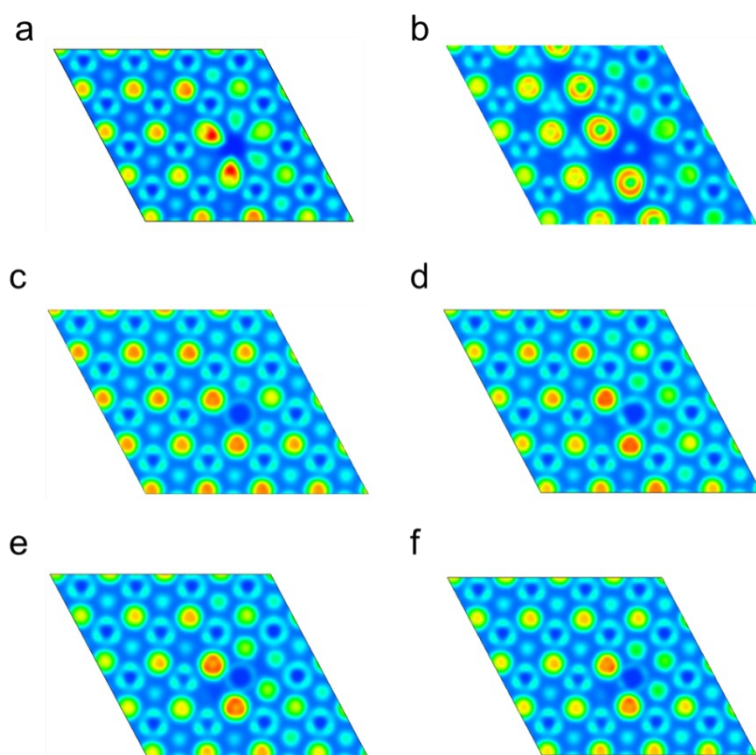

**Fig. S2** The electron localization function of (a) Mg-MnO<sub>2</sub>, (b) Ca-MnO<sub>2</sub>, (c) Ni-MnO<sub>2</sub>, (d) Ag-MnO<sub>2</sub>, (e) Cu-MnO<sub>2</sub>, and (f) Co-MnO<sub>2</sub> configuration.

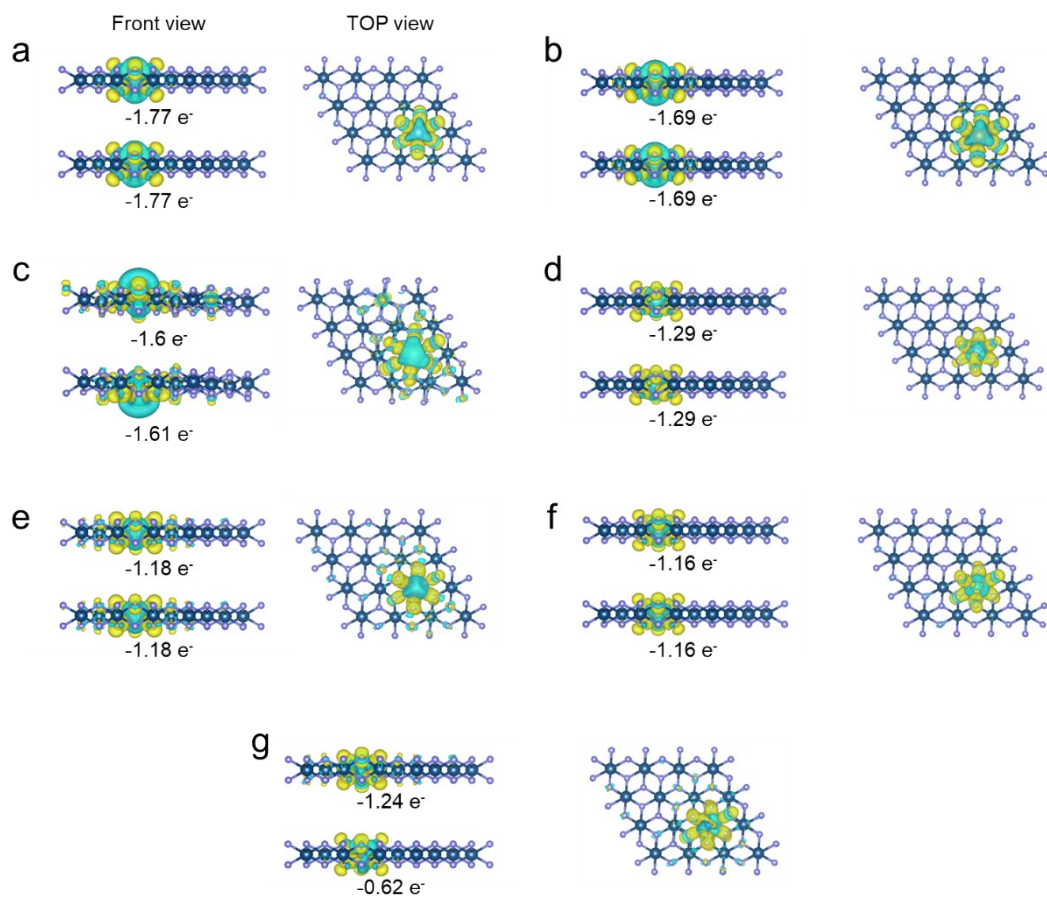

**Fig. S3** Difference charge density map of the stable (a) Fe- $\text{MnO}_2$ , (b) Mg- $\text{MnO}_2$ , (c) Ca- $\text{MnO}_2$ , (d) Ni- $\text{MnO}_2$ , (e) Ag- $\text{MnO}_2$ , (f) Cu- $\text{MnO}_2$ , and (g) Co- $\text{MnO}_2$  configuration, where blue color indicates electron loss and yellow color indicates electron accumulation. The numbers on the difference charge density are the corresponding Bader charge values.



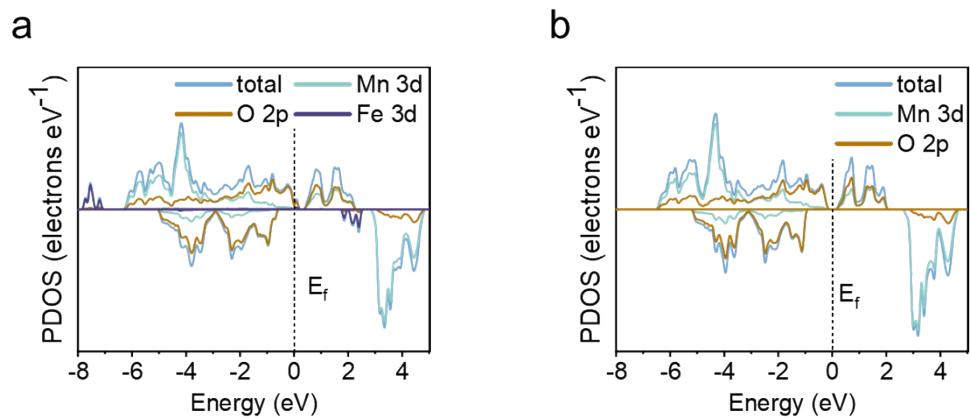

**Fig. S4** Calculated PDOS of (a) Fe-MnO<sub>2</sub> and (b) MnO<sub>2</sub> with aligned Fermi level.

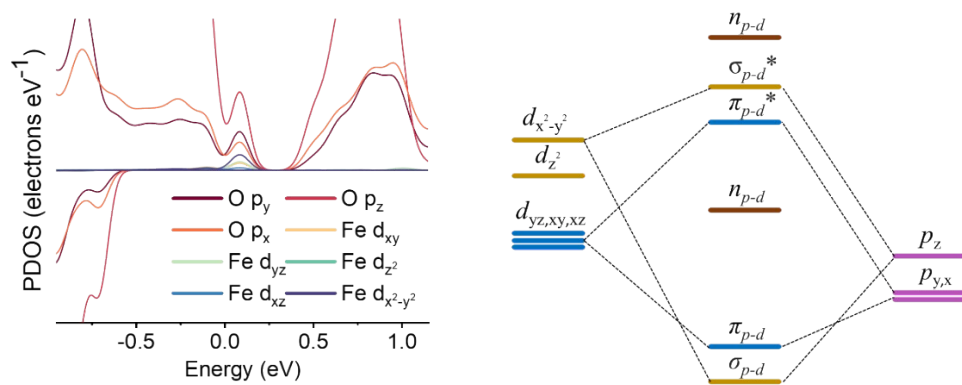

**Fig. S5** The detailed PDOS for the Fe 3d and O 2p orbitals of Fe-MnO<sub>2</sub> and orbitals hybridization.

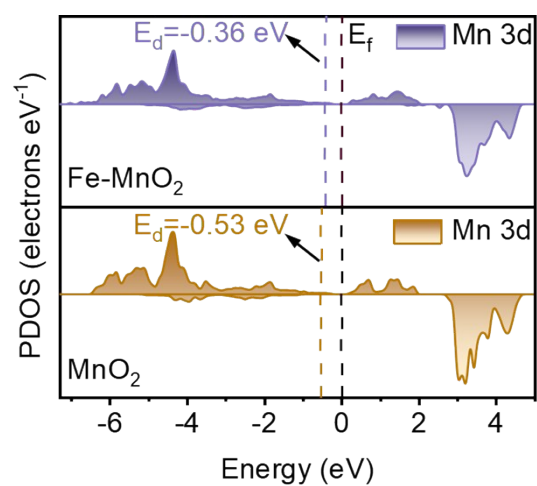

**Fig. S6** The PDOS of Fe-MnO<sub>2</sub> and MnO<sub>2</sub> relative to the d-band center of the Fermi energy level.

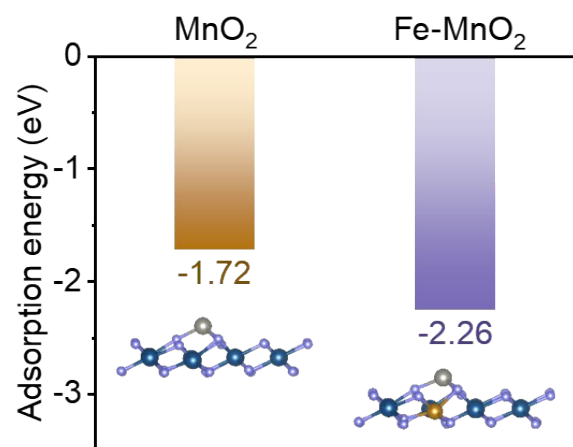

**Fig. S7**  $\text{Zn}^{2+}$  adsorption energy in  $\text{MnO}_2$  and  $\text{Fe-MnO}_2$  configurations and their schematic diagrams.

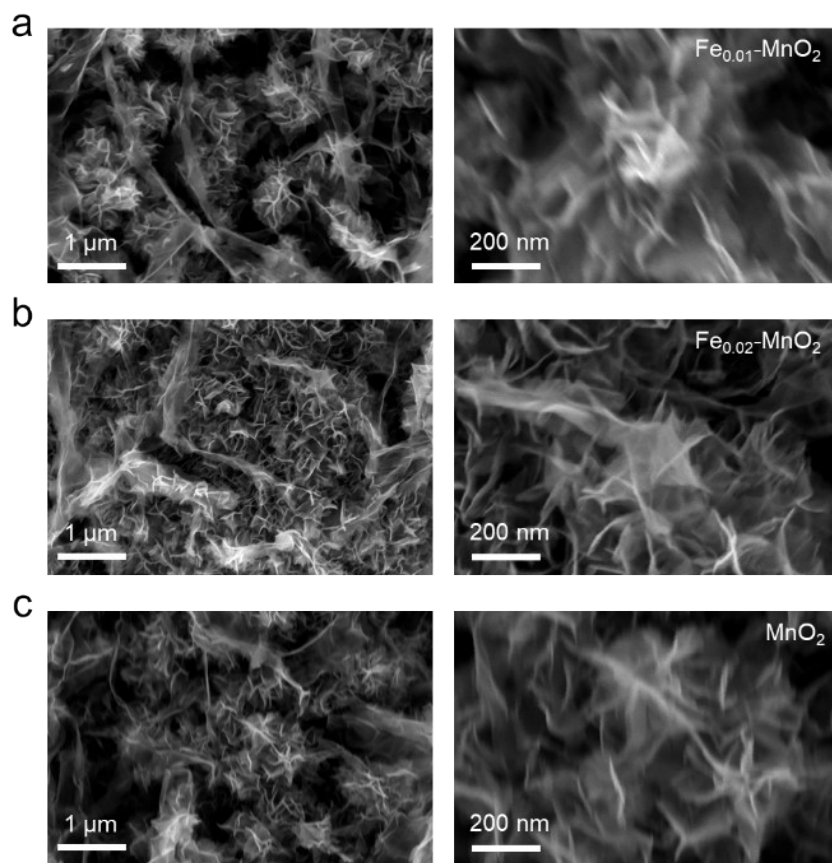

**Fig. S8** SEM images of (a)  $\text{Fe}_{0.01}\text{-MnO}_2$ , (b)  $\text{Fe}_{0.02}\text{-MnO}_2$ , and (c)  $\text{MnO}_2$  samples.

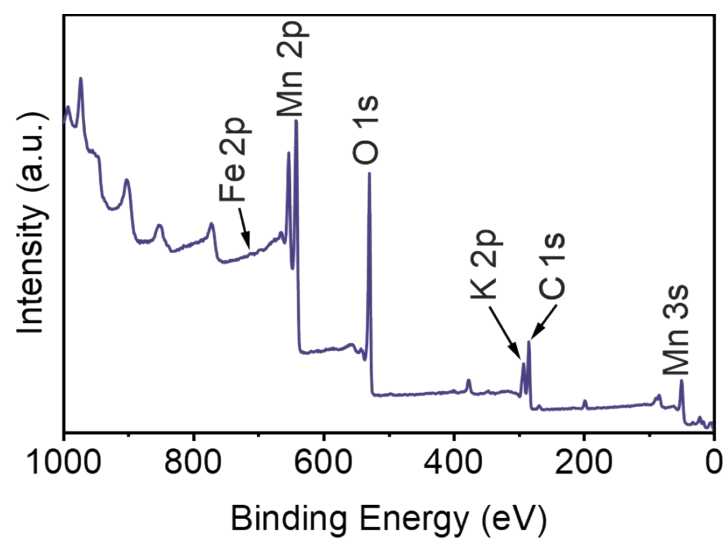

**Fig. S9** The total XPS spectrum of Fe-MnO<sub>2</sub>.

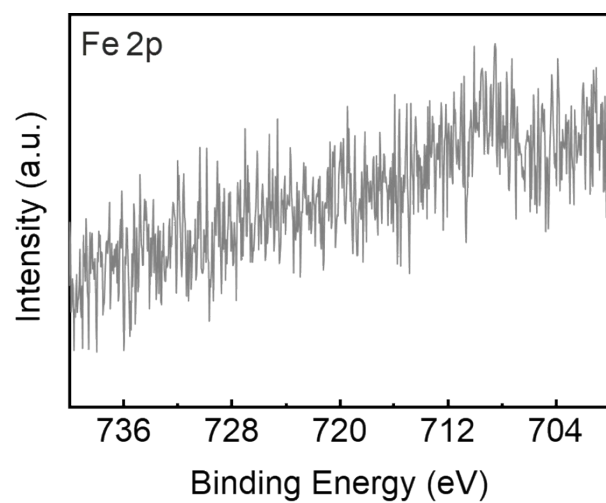

**Fig. S10** Fe 2p XPS spectra of Fe-MnO<sub>2</sub> materials.

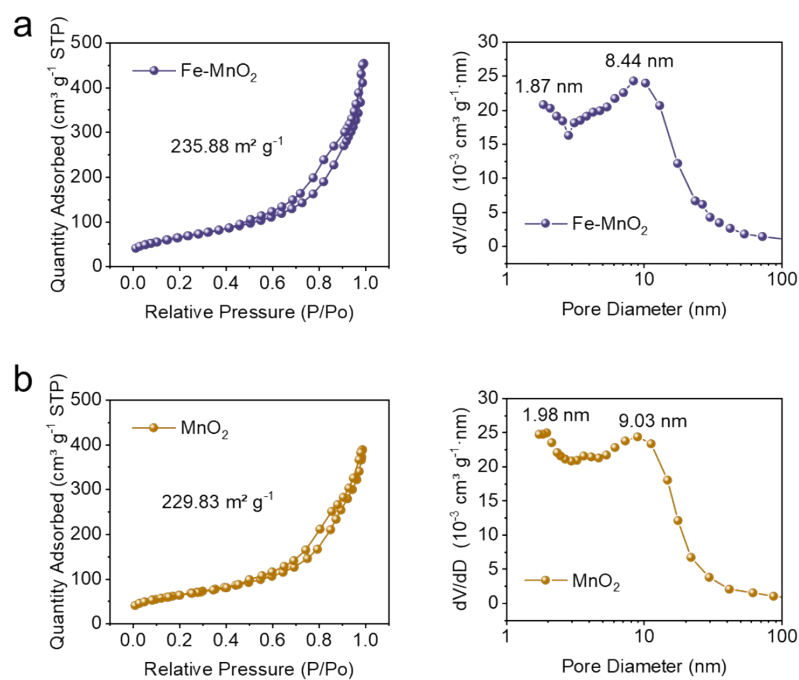

**Fig. S11** The nitrogen adsorption-desorption isotherm and pore size distribution of  
a) Fe-MnO<sub>2</sub> and b) MnO<sub>2</sub> samples.



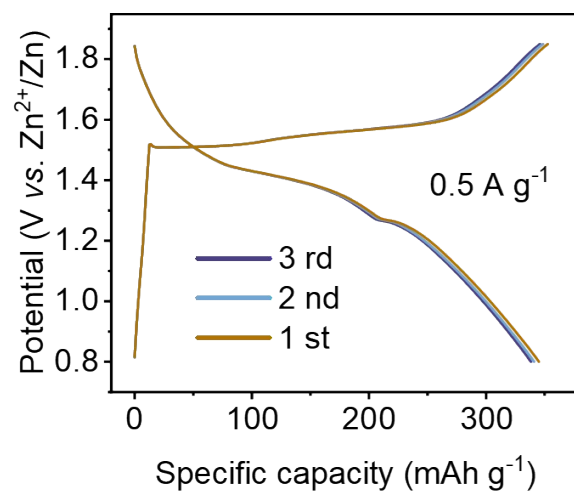

**Fig. S12** The GCD curves of Fe-MnO<sub>2</sub> cathode at the current density of 0.5 A g<sup>-1</sup>.

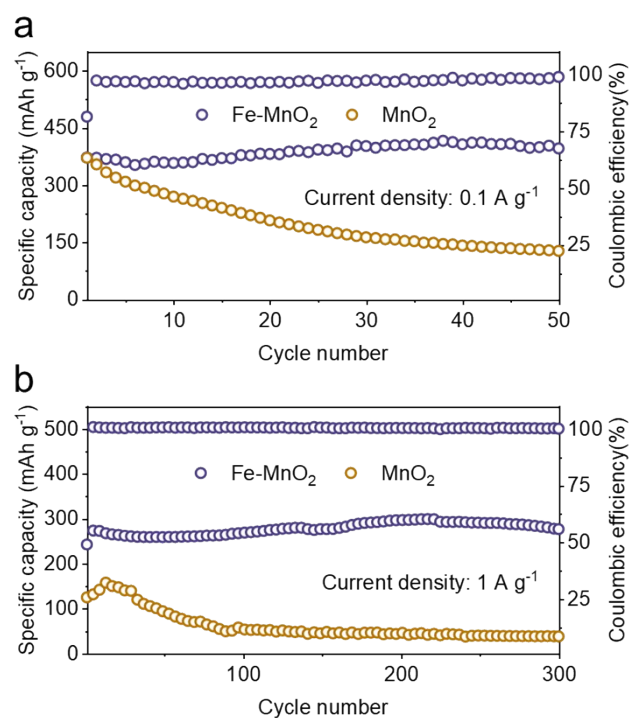

**Fig. S13** Cycling performance of Fe-MnO<sub>2</sub> and MnO<sub>2</sub> cathodes at low current of 0.1 and 1 A g<sup>-1</sup>.

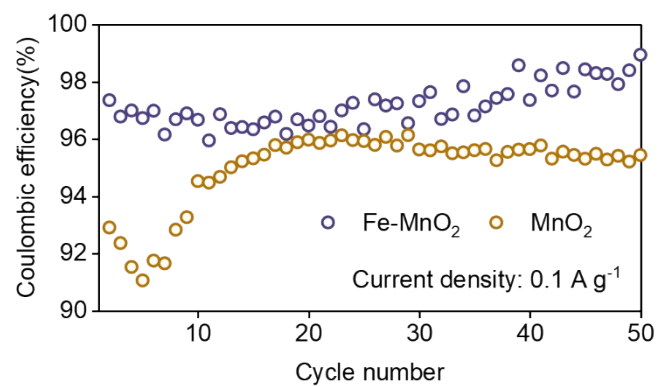

**Fig. S14** The CE of Fe-MnO<sub>2</sub> and MnO<sub>2</sub> cathodes at a low rate of 0.1 A g<sup>-1</sup>.

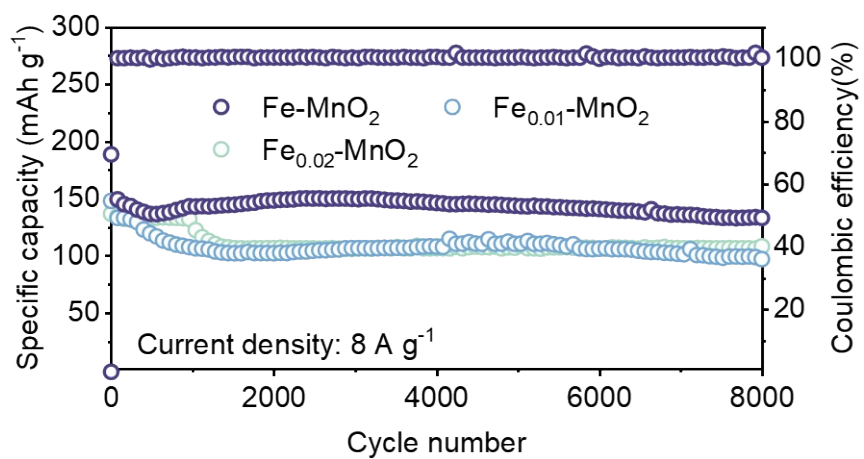

**Fig. S15** Cycling abilities at  $8 \text{ A g}^{-1}$  of  $\text{Fe-MnO}_2$ ,  $\text{Fe}_{0.01}\text{-MnO}_2$  and  $\text{Fe}_{0.02}\text{-MnO}_2$ .

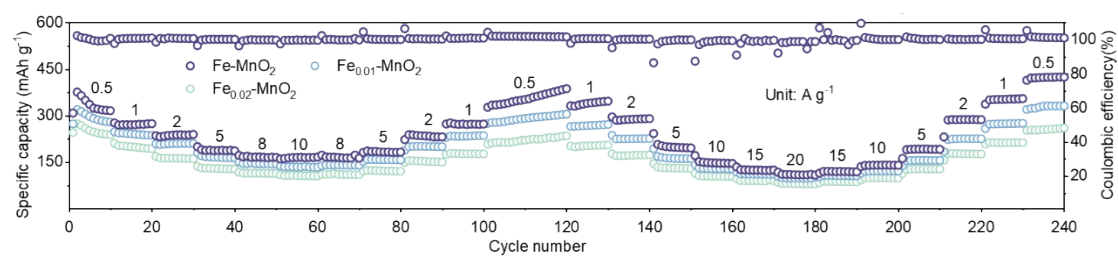

**Fig. S16** Rate performance at various current densities of  $\text{Fe-MnO}_2$ ,  $\text{Fe}_{0.01}\text{-MnO}_2$  and  $\text{Fe}_{0.02}\text{-MnO}_2$ .

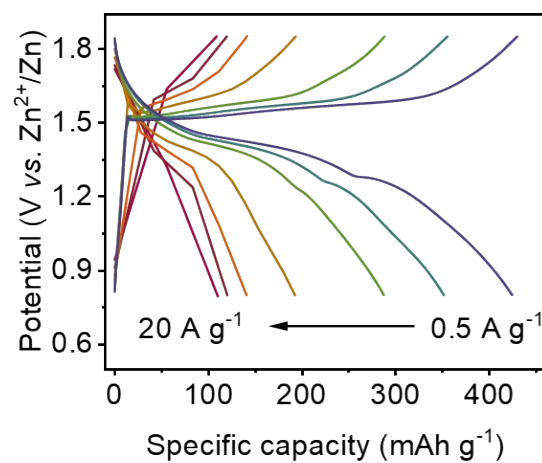

**Fig. S17** The GCD curves of Fe-MnO<sub>2</sub> cathode at 0.5-20 A g<sup>-1</sup>.

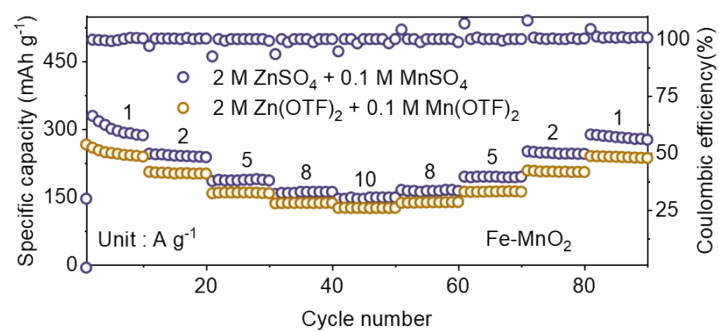

**Fig. S18** Rate performance of Fe-MnO<sub>2</sub> cathode in 2 M Zn(OTF)<sub>2</sub> + 0.1 M Mn(OTF)<sub>2</sub> and 2 M ZnSO<sub>4</sub> + 0.1 M MnSO<sub>4</sub> electrolytes at various current densities.

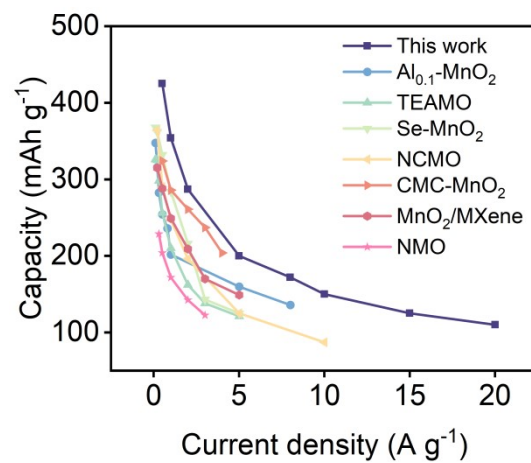

**Fig. S19** Comparison of rate performance between Fe-MnO<sub>2</sub> and other cathode materials previously reported in AZIBs (excluding CC mass).



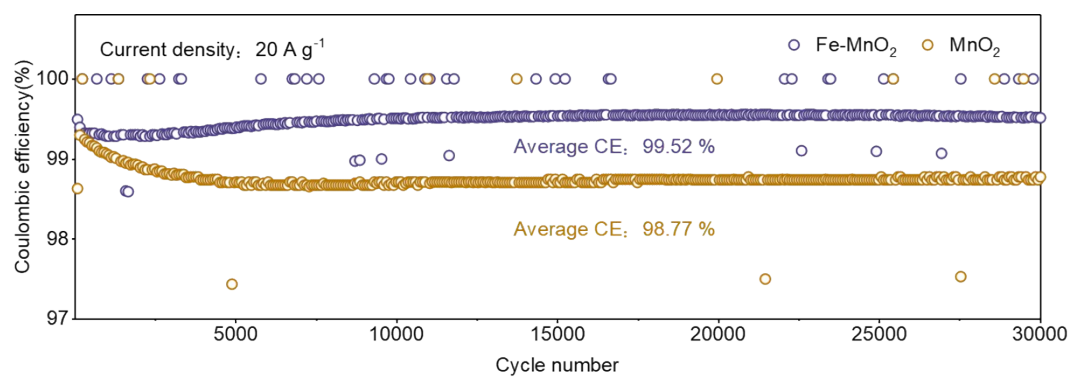

**Fig. S20** The CEs of Fe-MnO<sub>2</sub> and MnO<sub>2</sub> cathodes under the 30,000 cycles test.

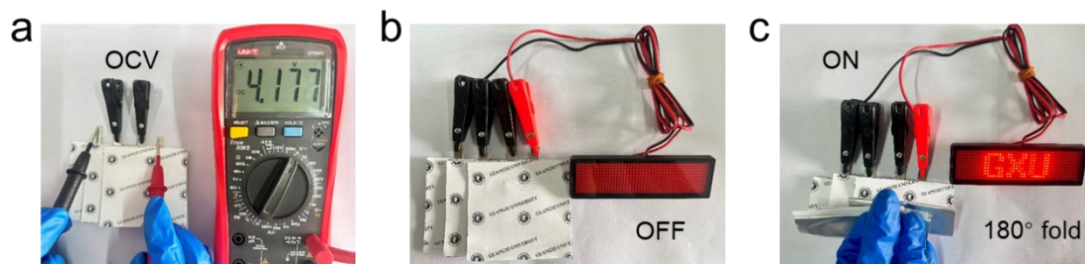

**Fig. S21** (a) The OCV of three Zn||Fe-MnO<sub>2</sub> pouch cells. (b) OFF state of LEDs connected to three cells. (c) ON state of LEDs connected to three cells with 180°fold.

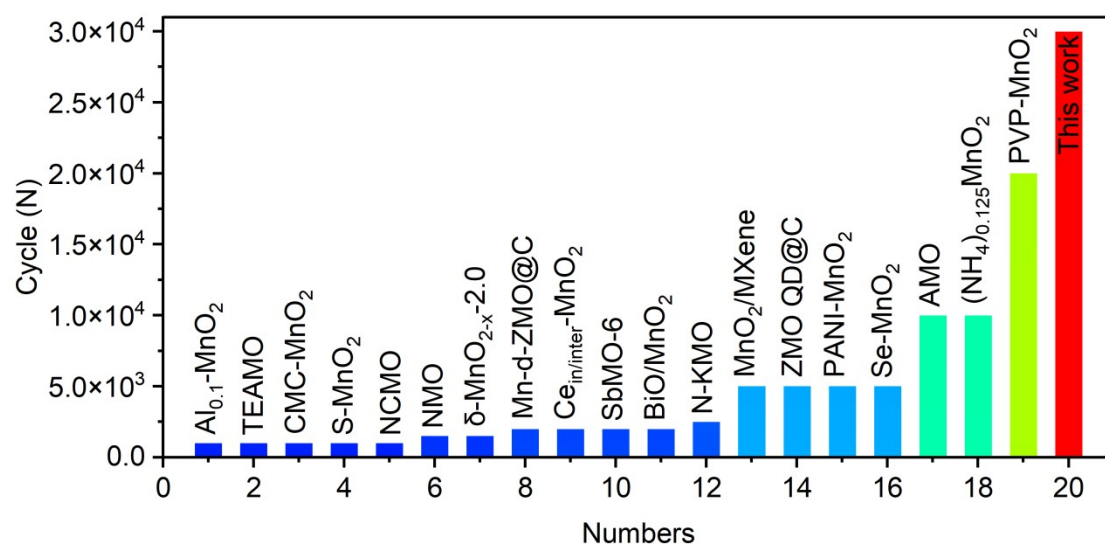

**Fig. S22** Comparison of cycling ability between Fe-MnO<sub>2</sub> and other cathode materials previously reported in AZIBs (excluding CC mass).

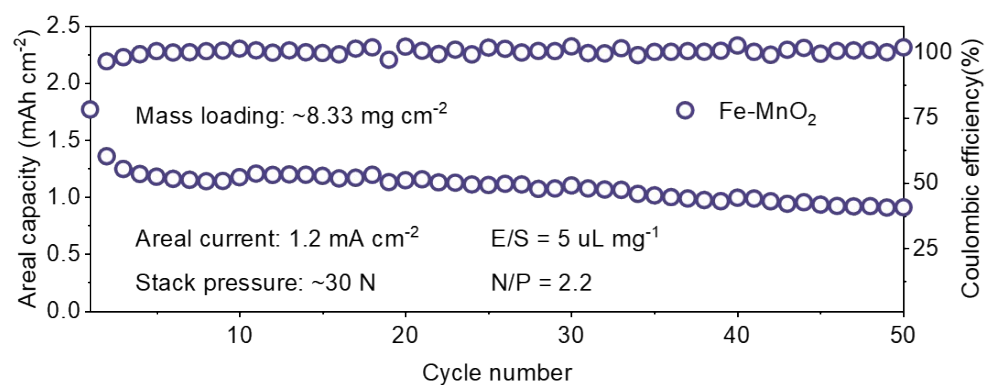

**Fig. S23** The performance of Zn || Fe-MnO<sub>2</sub> pouch cell with a high loading of  $\sim 8.33 \text{ mg cm}^{-2}$  Fe-MnO<sub>2</sub> (porosity:  $0.71 \text{ cm}^3 \text{ g}^{-1}$ ).

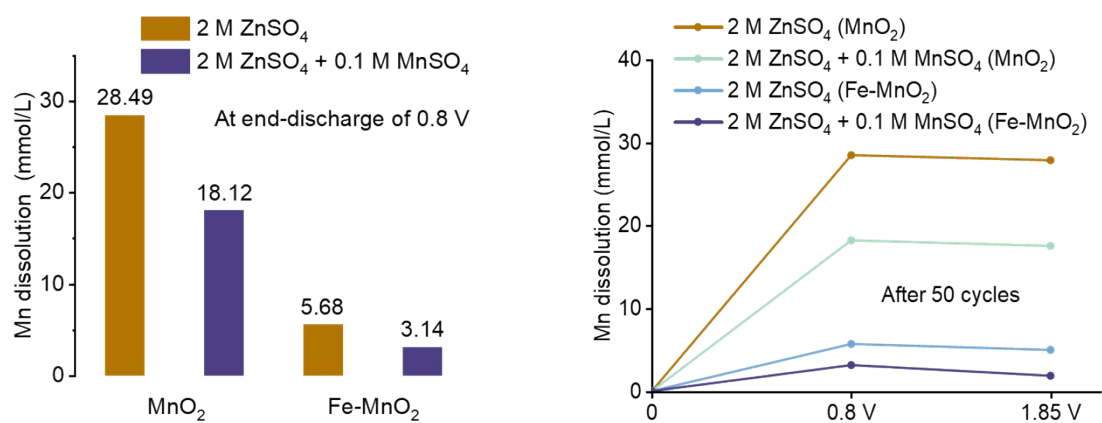

**Fig. S24** UV-vis of Fe-MnO<sub>2</sub> and MnO<sub>2</sub> cathodes at the end-discharge and end-charge after 50 cycles in 2 M ZnSO<sub>4</sub> and 2 M ZnSO<sub>4</sub> + 0.1 M MnSO<sub>4</sub> electrolytes.

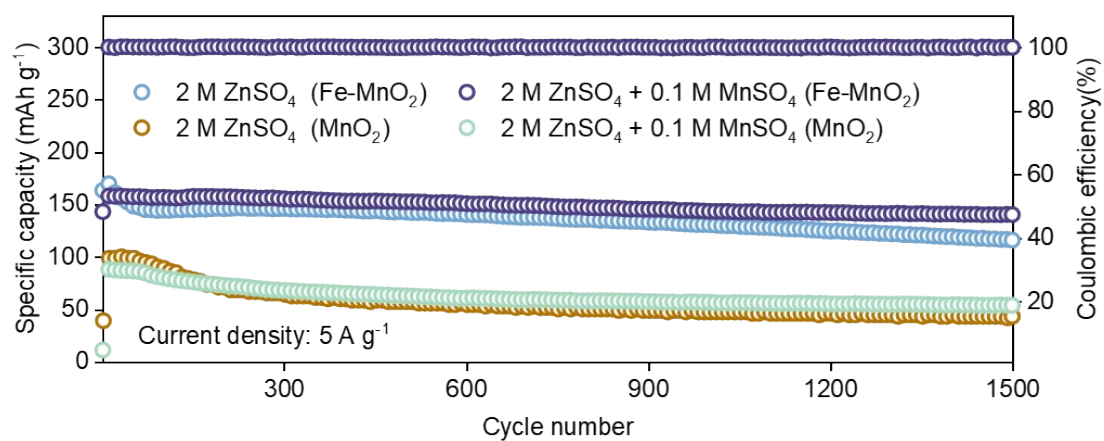

**Fig. S25** Cycling test of  $\text{Fe-MnO}_2$  and  $\text{MnO}_2$  cathodes in  $2 \text{ M ZnSO}_4$  and  $2 \text{ M ZnSO}_4 + 0.1 \text{ M ZnSO}_4$  electrolytes.

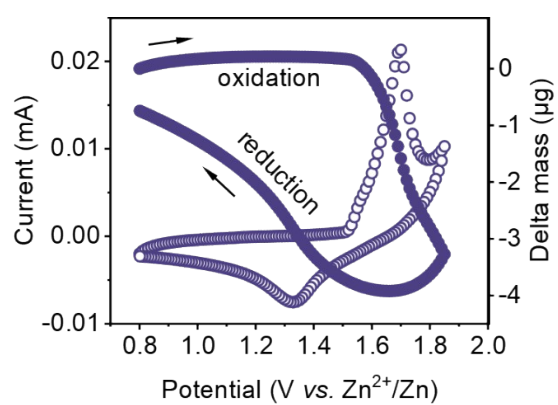

**Fig. S26** Results of CV test for the Fe-MnO<sub>2</sub> electrode at 1 mV s<sup>-1</sup> in 2 M ZnSO<sub>4</sub> + 0.1 M MnSO<sub>4</sub> electrolytes and the corresponding in situ EQCM measurement results.

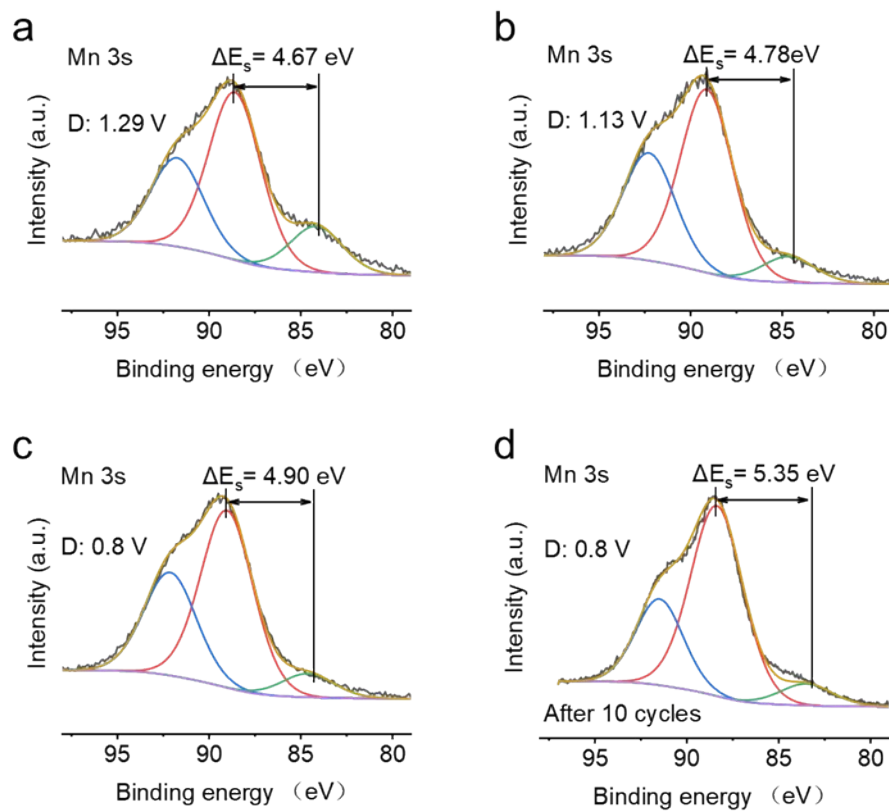

**Fig. S27** XPS spectra of Mn 3s at (a-c) 1<sup>st</sup> and (d) 10<sup>th</sup> discharge states of Fe-MnO<sub>2</sub> cathode.



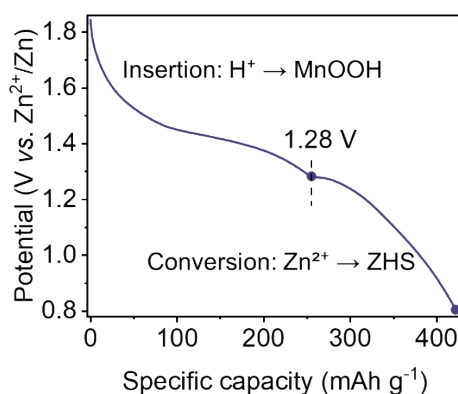

**Fig. S28** Capacity contribution partitioning based on insertion and conversion reactions.

Note: The measured capacity of  $423 \text{ mAh g}^{-1}$  consists of host and non-host processes, where the host process is primarily provided by  $\text{H}^+$  insertion and the non-host process consists of  $\text{Zn}^{2+}$  conversion and  $\text{Mn}^{2+}$  deposition/dissolution. Integrated with operando XRD analysis, it is inferred that the process primarily involves  $\text{H}^+$  insertion before 1.28 V, followed by  $\text{Zn}^{2+}$  conversion reactions after 1.28 V. Meanwhile,  $\text{Mn}^{2+}$  deposition and dissolution may accompany the overall redox process. Among which,  $\text{H}^+$  insertion is  $\text{MnO}_2 + \text{H}^+ + \text{e}^- \rightarrow \text{MnOOH}$  and  $\text{Zn}^{2+}$  conversion is  $4\text{Zn}^{2+} + 6\text{OH}^- + \text{SO}_4^{2-} + 5\text{H}_2\text{O} \rightarrow \text{Zn}_4(\text{OH})_6\text{SO}_4 \cdot 5\text{H}_2\text{O}$ .

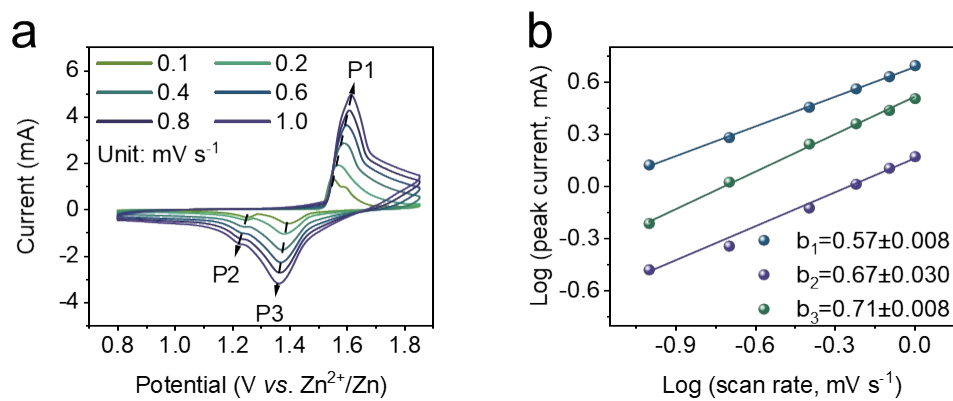

**Fig. S29** (a) CV curves at different scan rates and (b) the corresponding log (*i*) versus log (*v*) plots at each redox peak of Fe-MnO<sub>2</sub> cathode.

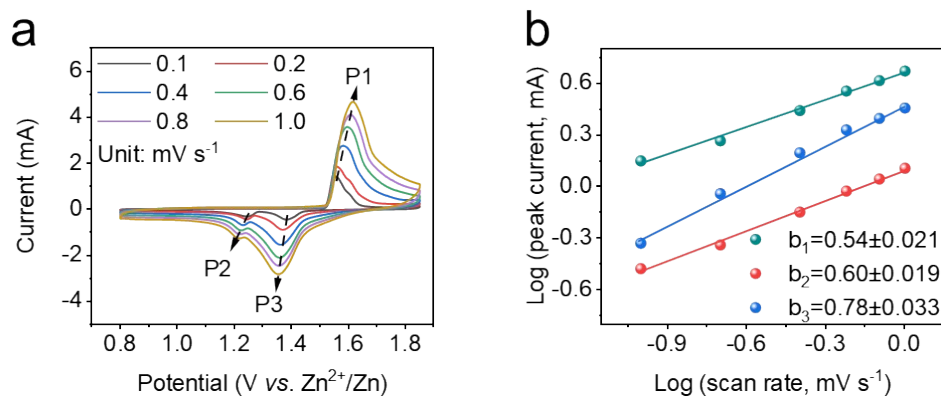

**Fig. S30** (a) CV curves at different scan rates and (b) the corresponding log (*i*) versus log (*v*) plots at each redox peak of MnO<sub>2</sub> cathode.

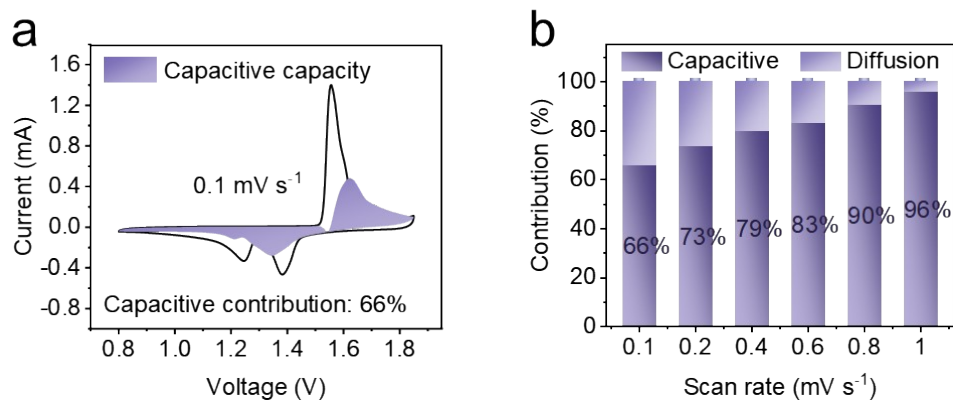

**Fig. S31** (a) The capacitive and diffusion-controlled contribution of Fe-MnO<sub>2</sub> cathode at a scan rate of 0.1 mV s<sup>-1</sup>. (b) Capacitive/diffusive fractions at different scan rates for Fe-MnO<sub>2</sub>.

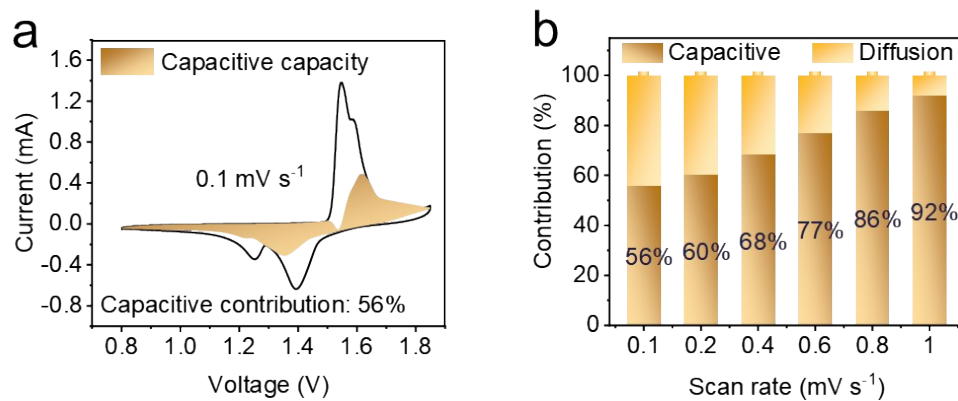

**Fig. S32** (a) The capacitive and diffusion-controlled contribution of MnO<sub>2</sub> cathode at a scan rate of 0.1 mV s<sup>-1</sup>. (b) Capacitive/diffusive fractions at different scan rates for MnO<sub>2</sub>.

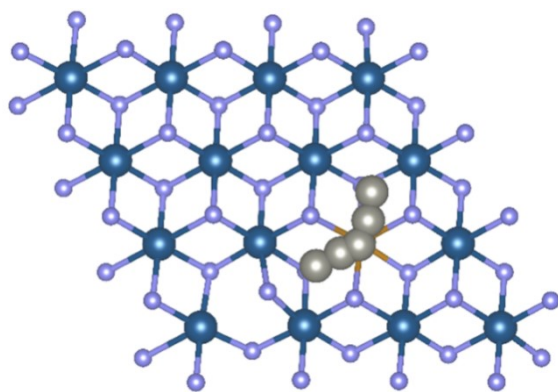

**Fig. S33**  $\text{Zn}^{2+}$  diffusion paths in Fe-MnO<sub>2</sub>.

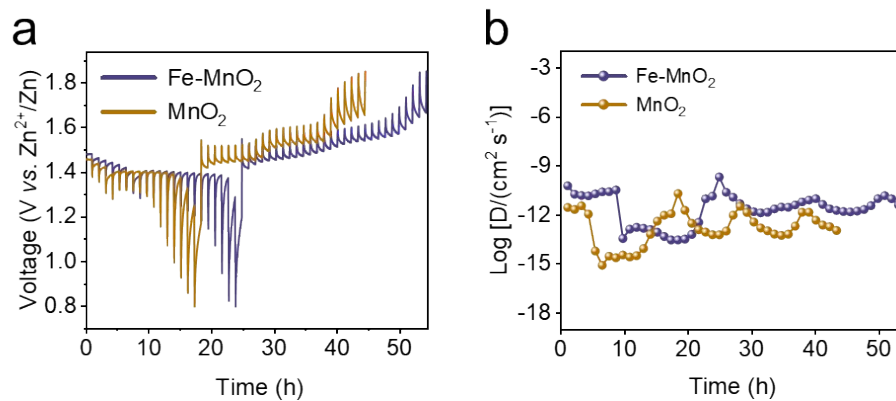

**Fig. S34** (a) GITT curves of Fe-MnO<sub>2</sub> and MnO<sub>2</sub> for the charge and discharge process. (b) Corresponding ion diffusion coefficients of Fe-MnO<sub>2</sub> and MnO<sub>2</sub>.

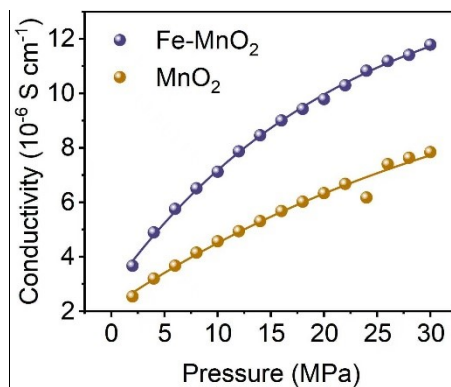

**Fig. S35** The conductivity of Fe-MnO<sub>2</sub> and MnO<sub>2</sub> samples by four-probe test.

Note: Electrical conductivity ( $\sigma$ ) is obtained as an average value and the R-square of Fe-MnO<sub>2</sub> and MnO<sub>2</sub> are 0.9987 and 0.9816, respectively.



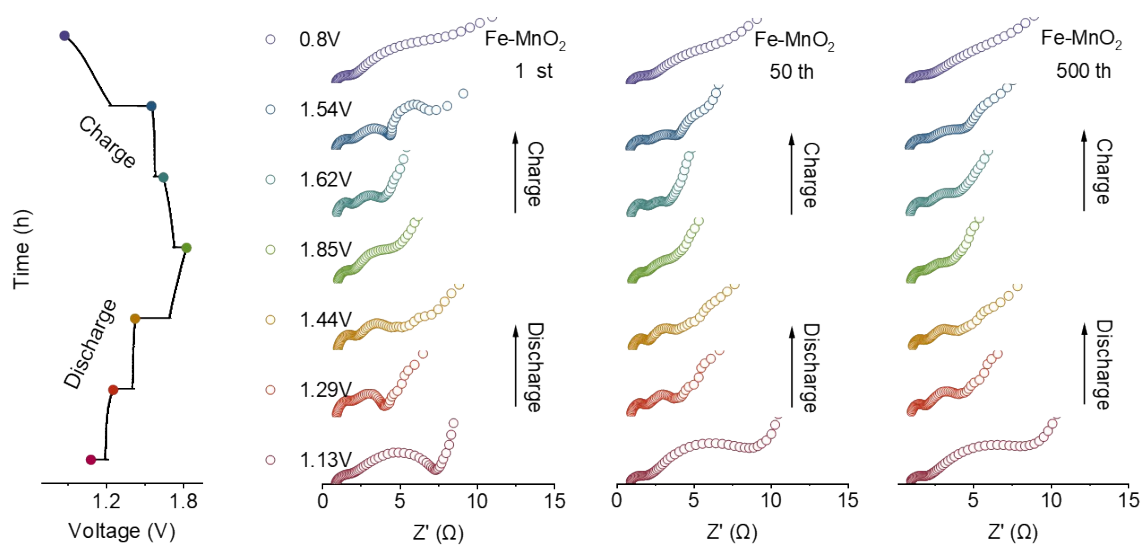

**Fig. S36** *In-situ* EIS of Fe-MnO<sub>2</sub> cathode after 1<sup>st</sup>, 50<sup>th</sup>, and 500<sup>th</sup> cycles.

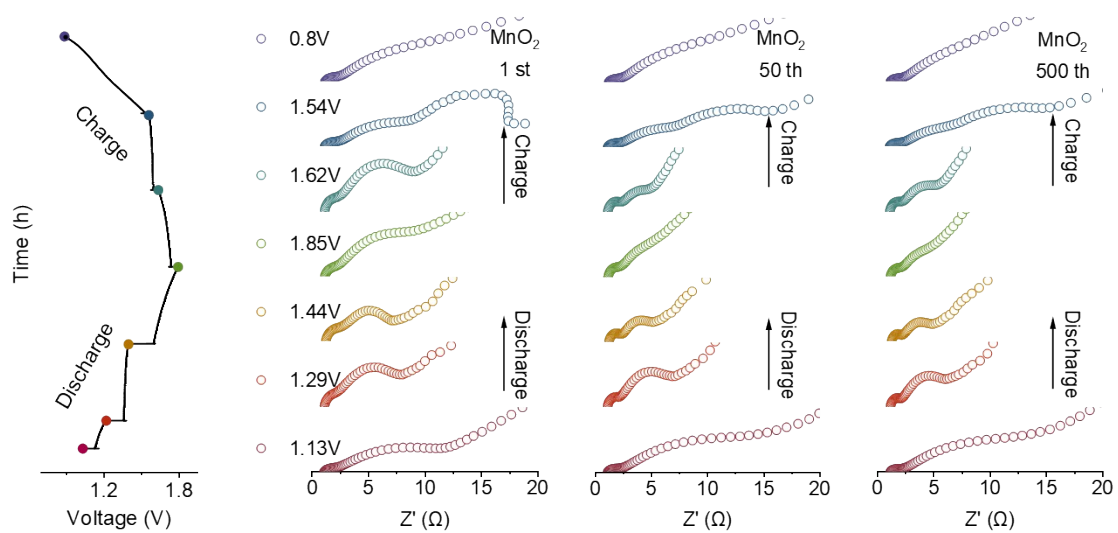

**Fig. S37** *In-situ* EIS of  $\text{MnO}_2$  cathode after 1<sup>st</sup>, 50<sup>th</sup>, and 500<sup>th</sup> cycles.

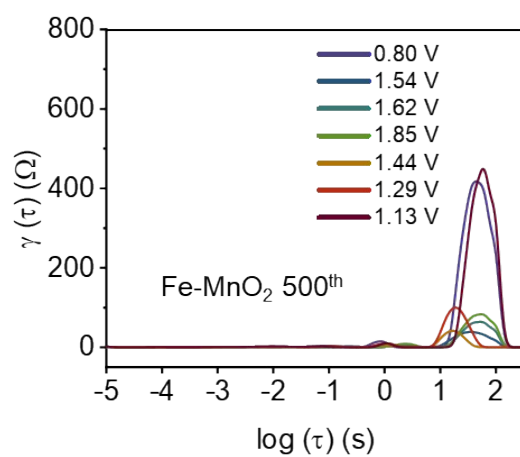

**Fig. S38** DRT plots calculated from *In-situ* EIS measurements of Fe-MnO<sub>2</sub> at 500<sup>th</sup> cycles within the total range of  $10^{-5}$ - $10^{2.5}$  s.

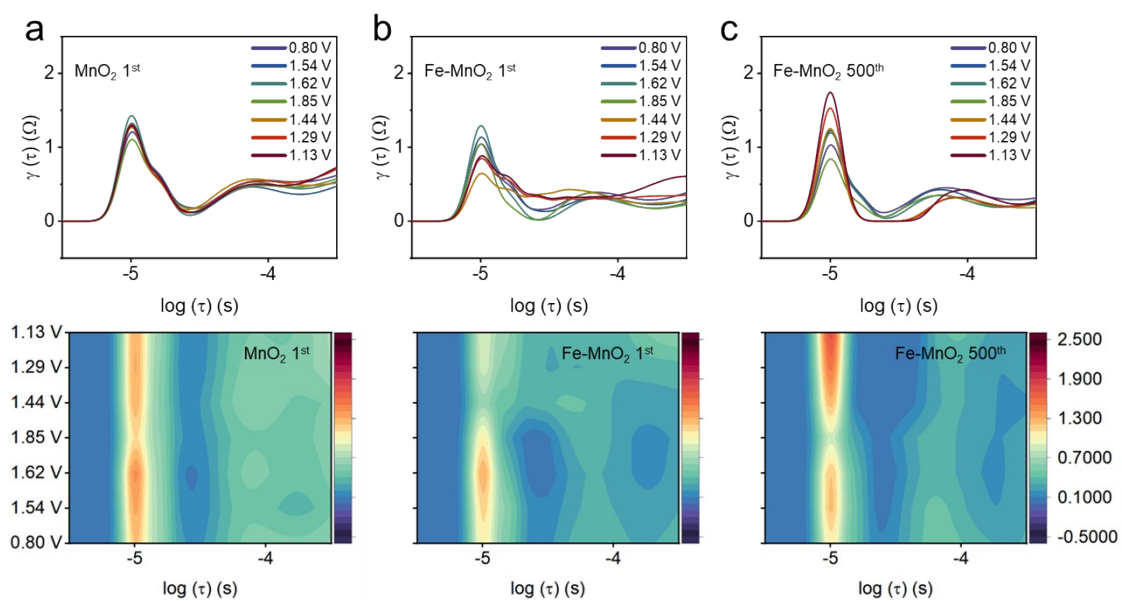

**Fig. S39** DRT plots calculated from *In-situ* EIS measurements of (a)  $\text{MnO}_2$  at 1<sup>st</sup> cycle and (b, c)  $\text{Fe-MnO}_2$  at 1<sup>st</sup> and 500<sup>th</sup> cycles within the range of  $10^{-5.5}$ - $10^{-3.5}$  s.

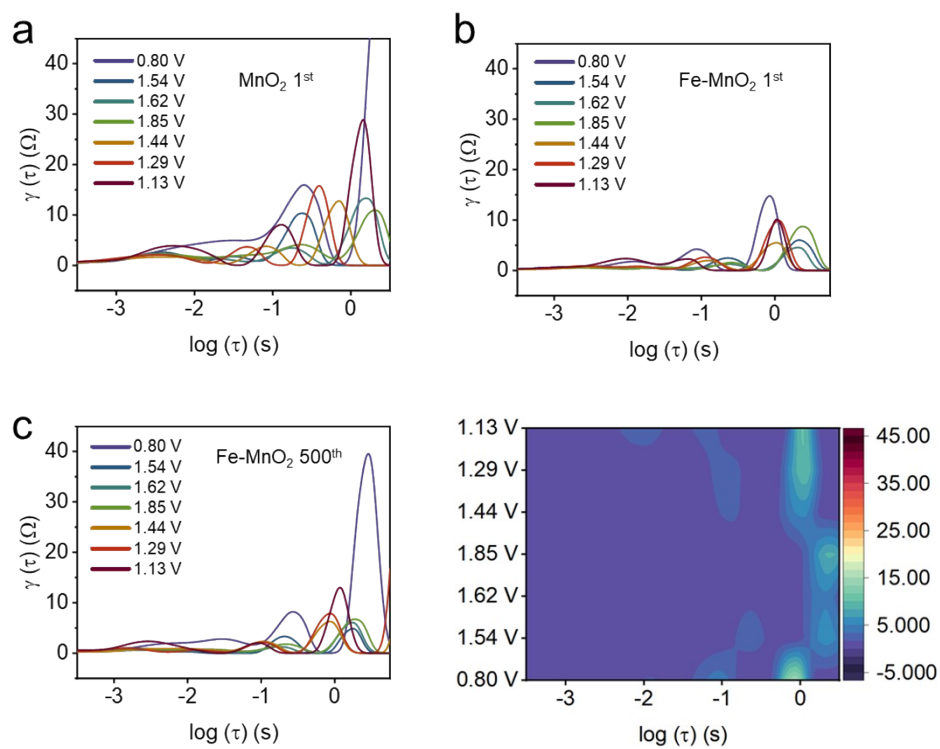

**Fig. S40** DRT plots calculated from *In-situ* EIS measurements of (a) MnO<sub>2</sub> at 1<sup>st</sup> cycle and (b, c) Fe-MnO<sub>2</sub> at 1<sup>st</sup> and 500<sup>th</sup> cycles within the range of  $10^{-3.5}$ - $10^{0.5}$  s.

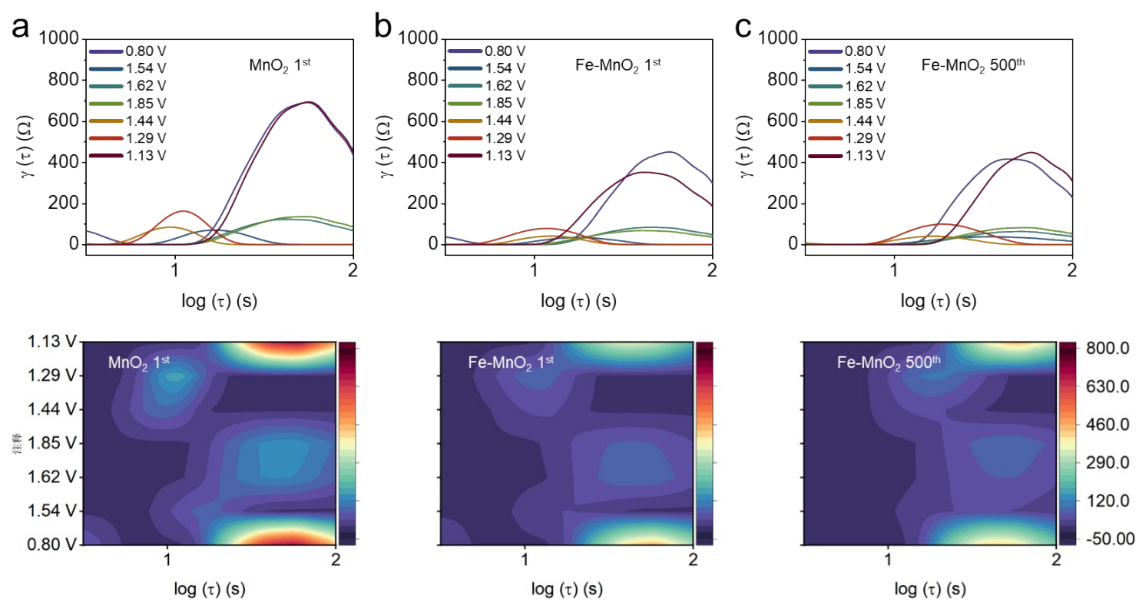

**Fig. S41** DRT plots calculated from *In-situ* EIS measurements of (a)  $\text{MnO}_2$  at 1<sup>st</sup> cycle and (b, c)  $\text{Fe-MnO}_2$  at 1<sup>st</sup> and 500<sup>th</sup> cycles within the range of  $10^{0.5}$ - $10^2$  s.

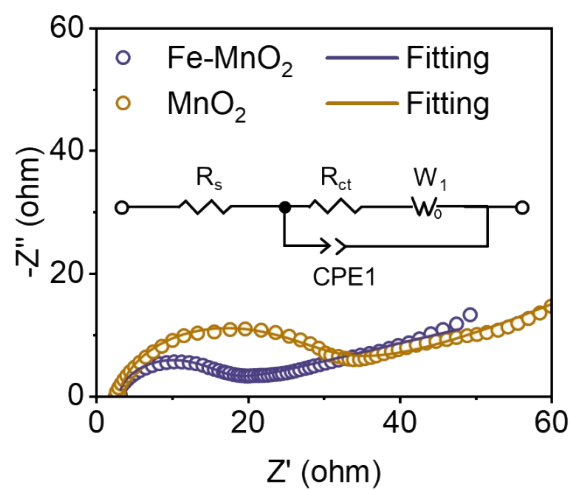

**Fig. S42** Nyquist plots of high-load Fe-MnO<sub>2</sub> and MnO<sub>2</sub> cathodes and their equivalent circuit fits.

**Table S1.** Detailed DFT calculation parameters of M-MnO<sub>2</sub> configurations (M: Fe, Mg, Ca, Ni, Ag, Cu and Co)

| Configurations      | Functional/U | Spin | Supercell | Bader Workflow |
|---------------------|--------------|------|-----------|----------------|
| Fe-MnO <sub>2</sub> | PBE-GGA/5.3  | 5    | 2*2*1     | ZAVL-x(Fe)     |
| Mg-MnO <sub>2</sub> | PBE-GGA/0    | 0    | 2*2*1     | ZAVL-x(Mg)     |
| Ca-MnO <sub>2</sub> | PBE-GGA/0    | 0    | 2*2*1     | ZAVL-x(Ca)     |
| Ni-MnO <sub>2</sub> | PBE-GGA/6.1  | 2    | 2*2*1     | ZAVL-x(Ni)     |
| Ag-MnO <sub>2</sub> | PBE-GGA/0    | 0    | 2*2*1     | ZAVL-x(Ag)     |
| Cu-MnO <sub>2</sub> | PBE-GGA/7.1  | 1    | 2*2*1     | ZAVL-x(Cu)     |
| Co-MnO <sub>2</sub> | PBE-GGA/3.3  | 3    | 2*2*1     | ZAVL-x(Co)     |
| MnO <sub>2</sub>    | PBE-GGA/3.9  | 3    | 2*2*1     | ~              |

Note:

U: The DFT+U method was used, and U represents the U-value of DFT+U.

Spin: Spin-polarized calculations are performed. The values in the table represent magnetic moments.

The adsorption energies ( $E_{\text{ads}}$ ) were calculated as  $E_{\text{ads}} = E_{\text{ad/sub}} - E_{\text{ad}} - E_{\text{sub}}$ , where  $E_{\text{ad/sub}}$ ,  $E_{\text{ad}}$ , and  $E_{\text{sub}}$  are the optimized adsorbate/substrate system, the adsorbate, and the clean substrate, respectively.

The dissolution energies ( $E_{\text{dis}}$ ) were calculated as  $E_{\text{dis}} = E_{\text{sub}} - (E_{\text{sub/Mn}(n-1)} + \mu_{\text{Mn}})$ , where  $E_{\text{sub}}$ ,  $E_{\text{sub/Mn}(n-1)}$ , and  $\mu_{\text{Mn}}$  are the optimized substrate system, the substrate lacking a Mn atom, and the chemical potential of Mn, respectively.

Bader Workflow: Bader charge transfer values = ZAVL-x(M), where ZAVL and x(M) are the number of valence electrons in metal atom and the Net charge on a metal atom.



**Table S2.** The results of ICP-OES testing for three batches of Fe-MnO<sub>2</sub>

| Samples    | NO. 1   | NO. 2   | NO. 3   |
|------------|---------|---------|---------|
| Fe/(Fe+Mn) | 12.86 % | 13.14 % | 13.15 % |

Note:

The conversion between mass fraction and molar percentage follows the process:

$$W_{\text{Fe}}/M_{\text{Fe}}=N_{\text{Fe}} \quad W_{\text{Mn}}/M_{\text{Mn}}=N_{\text{Mn}}$$

$$\text{Fe}/(\text{Fe}+\text{Mn}) = N_{\text{Fe}}/(N_{\text{Fe}} + N_{\text{Mn}})*100\%$$

Where W is the mass fraction (wt.%), M is the relative atomic mass, and N is the relative molar number (mol), and Fe/(Fe+Mn) signifies the molar percentage.

**Table S3.** The EXAFS fitting results of Fe-MnO<sub>2</sub>

| Sample | Bond | R(Å)      | CN      | $\sigma^2(10^{-3} \text{ Å}^2)$ | $\Delta E_0(\text{eV})$ | R factor |
|--------|------|-----------|---------|---------------------------------|-------------------------|----------|
| Fe     | Fe-O | 1.94±0.02 | 5.4±1.2 | 4.2±2.7                         | -2.8±2.6                | 0.0197   |

**Table S4.** The comparison for Fe-MnO<sub>2</sub> and other cathodes in AZIBs

| Material/windows                                    | Mass loading/electrolyte                                                            | Rate                                                                                                     | Cycling                                                             | Ref. |
|-----------------------------------------------------|-------------------------------------------------------------------------------------|----------------------------------------------------------------------------------------------------------|---------------------------------------------------------------------|------|
| Al <sub>0.1</sub> -MnO <sub>2</sub> /0.8–1.8 V      | ~1.5 mg/<br>2.0 M ZnSO <sub>4</sub> + 0.1 M MnSO <sub>4</sub>                       | 348 mAh g <sup>-1</sup> at 0.1 A g <sup>-1</sup><br>136 mAh g <sup>-1</sup> at 8 A g <sup>-1</sup>       | 202 mAh g <sup>-1</sup> at 1 A g <sup>-1</sup><br>(1000 cycles)     | 4    |
| AMO/0.8–1.8 V                                       | 1-1.5 mg cm <sup>-2</sup> /<br>2.0 M ZnSO <sub>4</sub> + 0.1 M MnSO <sub>4</sub>    | 419 mAh g <sup>-1</sup> at 0.5 A g <sup>-1</sup><br>56 mAh g <sup>-1</sup> at 8 A g <sup>-1</sup>        | 129 mAh g <sup>-1</sup> at 4 A g <sup>-1</sup><br>(10000 cycles)    | 5    |
| PVP-MnO <sub>2</sub> /0.8–1.8 V                     | 0.75-1.5 mg cm <sup>-2</sup> /<br>2 M ZnSO <sub>4</sub> + 0.2 M MnSO <sub>4</sub>   | 317 mAh g <sup>-1</sup> at 0.125 A g <sup>-1</sup><br>106 mAh g <sup>-1</sup> at 12.5 A g <sup>-1</sup>  | 140 mAh g <sup>-1</sup> at 10 A g <sup>-1</sup><br>(20000 cycles)   | 6    |
| TEAMO/1.0–1.8 V                                     | 0.5-1.5 mg cm <sup>-2</sup> /<br>2.0 M ZnSO <sub>4</sub> + 0.1 M MnSO <sub>4</sub>  | 351 mAh g <sup>-1</sup> at 0.1 A g <sup>-1</sup><br>121 mAh g <sup>-1</sup> at 5 A g <sup>-1</sup>       | 105 mAh g <sup>-1</sup> at 1 A g <sup>-1</sup><br>(1000 cycles)     | 7    |
| Se-MnO <sub>2</sub> /0.8–1.8 V                      | 1.2 mg cm <sup>-2</sup> /<br>2.0 M ZnSO <sub>4</sub> + 0.1 M MnSO <sub>4</sub>      | 368 mAh g <sup>-1</sup> at 0.1 A g <sup>-1</sup><br>125 mAh g <sup>-1</sup> at 5 A g <sup>-1</sup>       | 102 mAh g <sup>-1</sup> at 3 A g <sup>-1</sup><br>(5000 cycles)     | 8    |
| CMC-MnO <sub>2</sub> /0.8–1.8 V                     | 1.2 mg (1.13 cm <sup>-2</sup> )/<br>2 M ZnSO <sub>4</sub> + 0.2 M MnSO <sub>4</sub> | 324 mAh g <sup>-1</sup> at 0.5 A g <sup>-1</sup><br>204 mAh g <sup>-1</sup> at 4 A g <sup>-1</sup>       | 215 mAh g <sup>-1</sup> at 1.5 A g <sup>-1</sup><br>(1000 cycles)   | 9    |
| S-MnO <sub>2</sub> /0.8–1.8 V                       | 1-1.4 mg cm <sup>-2</sup> /<br>2.0 M ZnSO <sub>4</sub> + 0.1 M MnSO <sub>4</sub>    | 324 mAh g <sup>-1</sup> at 0.2 A g <sup>-1</sup><br>205 mAh g <sup>-1</sup> at 2 A g <sup>-1</sup>       | 150 mAh g <sup>-1</sup> at 3 A g <sup>-1</sup><br>(1000 cycles)     | 10   |
| PANI-MnO <sub>2</sub> /1.0–1.8 V                    | 2.0 mg cm <sup>-2</sup> /<br>2.0 M ZnSO <sub>4</sub> + 0.1 M MnSO <sub>4</sub>      | 280 mAh g <sup>-1</sup> at 0.2 A g <sup>-1</sup><br>110 mAh g <sup>-1</sup> at 3 A g <sup>-1</sup>       | 125 mAh g <sup>-1</sup> at 2 A g <sup>-1</sup><br>(5000 cycles)     | 11   |
| N-KMO/1.0–1.8 V                                     | 1 mg cm <sup>-2</sup> /<br>2.0 M ZnSO <sub>4</sub> + 0.1 M MnSO <sub>4</sub>        | 298 mAh g <sup>-1</sup> at 0.1 A g <sup>-1</sup><br>106 mAh g <sup>-1</sup> at 10 A g <sup>-1</sup>      | 262 mAh g <sup>-1</sup> at 1 A g <sup>-1</sup><br>(2500 cycles)     | 12   |
| ZMO QD@C/1.0–1.8 V                                  | None/None                                                                           | 298 mAh g <sup>-1</sup> at 0.175 A g <sup>-1</sup><br>124.5 mAh g <sup>-1</sup> at 3.5 A g <sup>-1</sup> | 100.9 mAh g <sup>-1</sup> at 3.5 A g <sup>-1</sup><br>(5000 cycles) | 13   |
| NHMO/0.4–1.9 V                                      | 1-2 mg cm <sup>-2</sup> /<br>2.0 M ZnSO <sub>4</sub> + 0.1 M MnSO <sub>4</sub>      | 329 mAh g <sup>-1</sup> at 0.15 A g <sup>-1</sup><br>109 mAh g <sup>-1</sup> at 6 A g <sup>-1</sup>      | 109 mAh g <sup>-1</sup> at 6.0 A g <sup>-1</sup><br>(10000 cycles)  | 14   |
| NMO/1.0–1.8 V                                       | ~1.0 mg cm <sup>-2</sup> /<br>2.0 M ZnSO <sub>4</sub> + 0.1 M MnSO <sub>4</sub>     | 228.7 mAh g <sup>-1</sup> at 0.3 A g <sup>-1</sup><br>122.5 mAh g <sup>-1</sup> at 3 A g <sup>-1</sup>   | 141.4 mAh g <sup>-1</sup> at 2 A g <sup>-1</sup><br>(1500 cycles)   | 15   |
| Mn-d-ZMO@C/0.8–1.9 V                                | None/<br>2 M ZnSO <sub>4</sub> + 0.2 M MnSO <sub>4</sub>                            | 233 mAh g <sup>-1</sup> at 0.1 A g <sup>-1</sup><br>132 mAh g <sup>-1</sup> at 3 A g <sup>-1</sup>       | 82.7 mAh g <sup>-1</sup> at 3 A g <sup>-1</sup><br>(2000 cycles)    | 16   |
| NCMO/0.8–1.9 V                                      | ~1 mg cm <sup>-2</sup> /<br>2 M ZnSO <sub>4</sub> + 0.2 M MnSO <sub>4</sub>         | 364 mAh g <sup>-1</sup> at 0.2 A g <sup>-1</sup><br>84 mAh g <sup>-1</sup> at 10 A g <sup>-1</sup>       | 200 mAh g <sup>-1</sup> at 2 A g <sup>-1</sup><br>(1000 cycles)     | 17   |
| Ce <sub>in/inter</sub> -MnO <sub>2</sub> /0.9–1.8 V | 1~2 mg cm <sup>-2</sup> /<br>2 M ZnSO <sub>4</sub> + 0.1 M MnSO <sub>4</sub>        | 270.9 mAh g <sup>-1</sup> at 0.3 A g <sup>-1</sup><br>140.5 mAh g <sup>-1</sup> at 3 A g <sup>-1</sup>   | 148.9 mAh g <sup>-1</sup> at 3 A g <sup>-1</sup><br>(2000 cycles)   | 18   |

|                                                 |                                                                                  |                                                                                                         |                                                                         |                      |
|-------------------------------------------------|----------------------------------------------------------------------------------|---------------------------------------------------------------------------------------------------------|-------------------------------------------------------------------------|----------------------|
| $\delta$ -MnO <sub>2-x</sub> -2.0/<br>0.9–1.9 V | None                                                                             | 551.8 mAh g <sup>-1</sup> at 0.5 A g <sup>-1</sup><br>262.2 mAh g <sup>-1</sup> at 10 A g <sup>-1</sup> | ~332 mAh g <sup>-1</sup> at 3 A g <sup>-1</sup><br>(1500 cycles)        | 19                   |
| MnO <sub>2</sub> /MXene/<br>0.8–1.8 V           | ~1.5 mg cm <sup>-2</sup> /<br>2.0 M ZnSO <sub>4</sub> + 0.1 M MnSO <sub>4</sub>  | 315 mAh g <sup>-1</sup> at 0.2 A g <sup>-1</sup><br>149 mAh g <sup>-1</sup> at 5 A g <sup>-1</sup>      | 132 mAh g <sup>-1</sup> at 5 A g <sup>-1</sup><br>(5000 cycles)         | 20                   |
| SbMO-6/<br>0.8–1.8 V                            | ~1 mg cm <sup>-2</sup> /<br>2.0 M ZnSO <sub>4</sub> + 0.2 M MnSO <sub>4</sub>    | 221.8 mAh g <sup>-1</sup> at 0.1 A g <sup>-1</sup><br>125 mAh g <sup>-1</sup> at 5 A g <sup>-1</sup>    | 113 mAh g <sup>-1</sup> at 2 A g <sup>-1</sup><br>(2000 cycles)         | 21                   |
| BiO/MnO <sub>2</sub> /<br>0.8–1.9 V             | 1 ~ 2 mg cm <sup>-2</sup> /<br>3.0 M ZnSO <sub>4</sub> + 0.5 M MnSO <sub>4</sub> | 720.6 mAh g <sup>-1</sup> at 0.1 A g <sup>-1</sup><br>204.5 mAh g <sup>-1</sup> at 4 A g <sup>-1</sup>  | 161 mAh g <sup>-1</sup> at 2 A g <sup>-1</sup><br>(2000 cycles)         | 22                   |
| <b>Fe-MnO<sub>2</sub>/<br/>0.8–1.85 V</b>       | <b>0.8-1.2 mg/<br/>2.0 M ZnSO<sub>4</sub> + 0.1 M<br/>MnSO<sub>4</sub></b>       | <b>423 mAh g<sup>-1</sup> at 0.5 A g<sup>-1</sup><br/>109 mAh g<sup>-1</sup> at 20 A g<sup>-1</sup></b> | <b>112 mAh g<sup>-1</sup> at 20 A g<sup>-1</sup><br/>(30000 cycles)</b> | <b>This<br/>work</b> |

Note: All performance data are calculated based on the mass of the active materials (excluding carbon cloth or other substrates).

**Table S5.** The comparison for Fe-MnO<sub>2</sub> and other cathodes in AZIBs of cycling, rate, CE, capacity (at 0.5 A g<sup>-1</sup>), and retention

| Material/<br>windows                      | Mass loading/<br>electrolyte                                                           | Cycle<br>(k) | Retention<br>(%) | Capacity<br>(mAh g <sup>-1</sup> ) | CE (%)      | Rate<br>(A g <sup>-1</sup> ) | Ref.                 |
|-------------------------------------------|----------------------------------------------------------------------------------------|--------------|------------------|------------------------------------|-------------|------------------------------|----------------------|
| Al-MnO <sub>2</sub> /<br>0.8–1.8 V        | ~1.5 mg/<br>2.0 M ZnSO <sub>4</sub> + 0.1 M<br>MnSO <sub>4</sub>                       | 1            | 87               | 254.3                              | ~100        | 8                            | 4                    |
| AMO/<br>0.8–1.8 V                         | 1-1.5 mg cm <sup>-2</sup> /<br>2.0 M ZnSO <sub>4</sub> + 0.1 M<br>MnSO <sub>4</sub>    | 10           | 69               | 419                                | ~100        | 8                            | 5                    |
| NiMn-LDHv/<br>0.8–1.9 V                   | None/<br>2.0 M ZnSO <sub>4</sub> + 0.1 M<br>MnSO <sub>4</sub>                          | 2.5          | 91               | 224                                | ~100        | 11                           | 23                   |
| Se-MnO <sub>2</sub> /<br>0.8–1.8 V        | 1.2 mg cm <sup>-2</sup> /<br>2.0 M ZnSO <sub>4</sub> + 0.1 M<br>MnSO <sub>4</sub>      | 5            | ~100             | 332                                | ~100        | 5                            | 8                    |
| PVP-MnO <sub>2</sub> /<br>0.8–1.8 V       | 0.75-1.5 mg cm <sup>-2</sup> /<br>2 M ZnSO <sub>4</sub> + 0.2 M<br>MnSO <sub>4</sub>   | 20           | ~100             | 250                                | ~100        | 12.5                         | 6                    |
| Ce-MnO <sub>2</sub> /<br>0.9–1.8 V        | 1~2 mg cm <sup>-2</sup> /<br>2 M ZnSO <sub>4</sub> + 0.1 M<br>MnSO <sub>4</sub>        | 2            | ~100             | 279.7                              | ~100        | 3                            | 18                   |
| CMC-MnO <sub>2</sub> /<br>0.8–1.8 V       | 1.2 mg (1.13 cm <sup>-2</sup> )/<br>2 M ZnSO <sub>4</sub> + 0.2 M<br>MnSO <sub>4</sub> | 1            | 86.2             | 324                                | ~100        | 4                            | 9                    |
| IS-MnO <sub>2</sub> /<br>0.8–1.8 V        | None/<br>2.0 M ZnSO <sub>4</sub> + 0.1 M<br>MnSO <sub>4</sub>                          | 4            | 90.3             | 230                                | ~100        | 6                            | 24                   |
| <b>Fe-MnO<sub>2</sub>/<br/>0.8–1.85 V</b> | <b>0.8-1.2 mg/<br/>2.0 M ZnSO<sub>4</sub> + 0.1 M<br/>MnSO<sub>4</sub></b>             | <b>30</b>    | <b>89</b>        | <b>423</b>                         | <b>~100</b> | <b>20</b>                    | <b>This<br/>work</b> |

Note: All performance data are calculated based on the mass of the active materials (excluding carbon cloth or other substrates).

**Table S6.** Relevant parameters of the Mott-Schottky measurement

| Sample              | Frequency | AC amplitude | Dielectric constant | Area determination | R square |
|---------------------|-----------|--------------|---------------------|--------------------|----------|
| Fe-MnO <sub>2</sub> | 1.5 kHz   | 10 mV        | 5                   | 1 cm <sup>2</sup>  | 0.998    |
| MnO <sub>2</sub>    | 1.5 kHz   | 10 mV        | 5                   | 1 cm <sup>2</sup>  | 0.990    |

Note: The dielectric constant is relative to the vacuum dielectric constant ( $8.854 \times 10^{-12}$  F m<sup>-1</sup>). The area determination is the geometric area of the conductive glass on which the coating is applied.

**Table S7.** Relevant parameters of the four-probe measurement

| $\sigma(\text{Fe-MnO}_2)$ | $\sigma(\text{MnO}_2)$ | Pressure | Temperature | Humidity |
|---------------------------|------------------------|----------|-------------|----------|
| S cm <sup>-1</sup>        | S cm <sup>-1</sup>     | Mpa      | °C          | % RH     |
| 3.67E-06                  | 2.54E-06               | 2        | 25          | 65       |
| 4.89E-06                  | 3.20E-06               | 4        | 25          | 65       |
| 5.76E-06                  | 3.67E-06               | 6        | 25          | 65       |
| 6.51E-06                  | 4.15E-06               | 8        | 25          | 65       |
| 7.12E-06                  | 4.57E-06               | 10       | 25          | 65       |
| 7.87E-06                  | 4.94E-06               | 12       | 25          | 65       |
| 8.46E-06                  | 5.31E-06               | 14       | 25          | 65       |
| 9.00E-06                  | 5.68E-06               | 16       | 25          | 65       |
| 9.43E-06                  | 6.02E-06               | 18       | 25          | 65       |
| 9.79E-06                  | 6.34E-06               | 20       | 25          | 65       |
| 1.03E-05                  | 6.66E-06               | 22       | 25          | 65       |
| 1.08E-05                  | 6.17E-06               | 24       | 25          | 65       |
| 1.12E-05                  | 7.40E-06               | 26       | 25          | 65       |
| 1.14E-05                  | 7.64E-06               | 28       | 25          | 65       |
| 1.18E-05                  | 7.84E-06               | 30       | 25          | 65       |

**Table S8.** Results of equivalent circuit fit for Fe-MnO<sub>2</sub> cathode and related parameters

| Fe-MnO <sub>2</sub> | R <sub>s</sub> (Ω) | R <sub>ct</sub> (Ω) | CPE1   | CI <sub>s</sub> |
|---------------------|--------------------|---------------------|--------|-----------------|
| Value               | 3.04               | 8.09                | 0.93   | 0.45 %          |
| Residuals           | 2.52 %             | 12.30 %             | 2.16 % | ~               |



**Table S9.** Results of equivalent circuit fit for MnO<sub>2</sub> cathode and related parameters

| MnO <sub>2</sub> | R <sub>s</sub> ( $\Omega$ ) | R <sub>ct</sub> ( $\Omega$ ) | CPE1   | CI <sub>s</sub> |
|------------------|-----------------------------|------------------------------|--------|-----------------|
| Value            | 2.97                        | 14.6                         | 0.90   | 0.21 %          |
| Residuals        | 2.46 %                      | 7.21 %                       | 1.20 % | ~               |

## Reference

1. W. Kohn and L. J. Sham, *Phys. Rev.*, 1965, **140**, A1133-A1138.
2. G. Kresse and J. Hafner, *Phys. Rev. B*, 1993, **47**, 558-561.
3. G. Henkelman, B. P. Uberuaga and H. Jónsson, *J. Chem. Phys.*, 2000, **113**, 9901-9904.
4. Y. Zhao, S. Zhang, Y. Zhang, J. Liang, L. Ren, H. J. Fan, W. Liu and X. Sun, *Energy Environ. Sci.*, 2024, **17**, 1279-1290.
5. H. Yao, H. Yu, Y. Zheng, N. W. Li, S. Li, D. Luan, X. W. D. Lou and L. Yu, *Angew. Chem. Int. Ed.*, 2023, **62**, e202315257.
6. A. Zhang, R. Zhao, Y. Wang, J. Yue, J. Yang, X. Wang, C. Wu and Y. Bai, *Angew. Chem. Int. Ed.*, 2023, **62**, e202313163.
7. S. Wang, S. Yao, N. Dai, W. Fu, Y. Liu, K. Ji, Y. Ji, J. Yang, R. Liu, X. Li, J. Xie, Z. Yang and Y.-M. Yan, *Angew. Chem. Int. Ed.*, 2024, **63**, e202408414.
8. J. J. Ye, P. H. Li, Z. Hou, W. Zhang, W. Zhu, S. Jin and H. Ji, *Angew. Chem. Int. Ed.*, 2024, **63**, e202410900.
9. X. Zhang, X. Ma, H. Bi, Y. Zhang, P. Mi, F. Liu, X. Jin, Y. Chen, K. Zhang, J. Wang and Y. Dong, *Adv. Funct. Mater.*, 2024, **35**, 2411990.
10. Y. Zhao, P. Zhang, J. Liang, X. Xia, L. Ren, L. Song, W. Liu and X. Sun, *Energy Storage Mater.*, 2022, **47**, 424-433.
11. J. Huang, Z. Wang, M. Hou, X. Dong, Y. Liu, Y. Wang and Y. Xia, *Nat. Commun.*, 2018, **9**, 2906.
12. G. Cui, Y. Zeng, J. Wu, Y. Guo, X. Gu and X. W. Lou, *Adv. Sci.*, 2022, **9**, 2106067.
13. S. Deng, Z. Tie, F. Yue, H. Cao, M. Yao and Z. Niu, *Angew. Chem. Int. Ed.*, 2022, **61**, e202115877.
14. T. Sun, S. Zheng, Q. Nian and Z. Tao, *Small*, 2022, **18**, 2107115.
15. S. Wang, X. Zhao, H. Chen, J. Guo, R. Liu and D. a. Yang, *EcoMat*, 2022, **4**, e12249.
16. S. Islam, M. H. Alfaruqi, D. Y. Putro, S. Park, S. Kim, S. Lee, M. S. Ahmed, V. Mathew, Y.-K. Sun, J.-Y. Hwang and J. Kim, *Adv. Sci.*, 2021, **8**, 2002636.
17. X. Gao, C. Shen, H. Dong, Y. Dai, P. Jiang, I. P. Parkin, H. Zhang, C. J. Carmalt and G. He, *Energy Environ. Sci.*, 2024, **17**, 2287-2297.
18. Y. Chen, C. Lin, X. Chen, Z. Lu, K. Zhang, Y. Liu, J. Wang, G. Han and G. Xu, *Adv. Energy Mater.*, 2024, **14**, 2304303.
19. Y. Wang, Y. Zhang, G. Gao, Y. Fan, R. Wang, J. Feng, L. Yang, A. Meng, J. Zhao and Z. Li, *Nano-micro Lett.*, 2023, **15**, 219.
20. Y. Wang, L. Liu, Y. Wang, J. Qu, Y. Chen and J. Song, *ACS Nano*, 2023, **17**, 21761-21770.
21. H. Huang, H. Feng, Z. He, Y. Huang, J. Xu, C. Hu, Z. Chen, Z. Yang and W. Zhang, *ACS Nano*, 2024, **18**, 25601-25613.
22. X. Zhao, F. Zhang, H. Li, H. Dong, C. Yan, C. Meng, Y. Sang, H. Liu, Y.-G. Guo and Shuhua Wang, *Energy Environ. Sci.*, 2024, **17**, 3629-3640.
23. J. Li, X. Yang, J. Wang, C. Ma, T. Wang, N. Liu, X. Pang, Q. Zhang, C. Wu and X. Li, *Energy Storage Mater.*, 2025, **74**, 103887.
24. X. Li, D. He, Q. Zhou, X. Zhou, Z. Wang, C. Wei, Y. Shi, X. Hu, B. Huang, Z. Yang, X. Han, Y. Lin and Y. Yu, *Energy Environ. Sci.*, 2024, **17**, 9195.
